# Supplementary material for: Spectral properties of polypyridyl ruthenium complexes intercalated in DNA: theoretical insights into the surrounding effects of [Ru(dppz)(bpy)2]2+
Source: Royal Society of Chemistry journal article supplement (doi:10.1039/c2cp40935f), 2012-01-01
Supplement: c2cp40935f.pdf [file c2cp40935f.pdf]

## Supplementary material

|      | QM/CHARMM | QM/AMBER  | QM/AMBER:ERS | %FF   | %ERS |
|------|-----------|-----------|--------------|-------|------|
| 1 Ru | 0.901010  | 0.900434  | 0.903170     | 0.06  | 0.90 |
| 2 N  | -0.267782 | -0.265261 | -0.266307    | 0.95  | 0.27 |
| 3 N  | -0.260042 | -0.257370 | -0.257770    | 1.04  | 0.26 |
| 4 C  | -0.211774 | -0.207025 | -0.206294    | 2.29  | 0.21 |
| 5 C  | -0.221703 | -0.220072 | -0.216547    | 0.74  | 0.22 |
| 6 C  | -0.164638 | -0.155021 | -0.165156    | 6.20  | 0.17 |
| 7 C  | -0.170400 | -0.164198 | -0.171166    | 3.78  | 0.17 |
| 8 C  | -0.315804 | -0.335806 | -0.339007    | 5.96  | 0.34 |
| 9 C  | -0.310847 | -0.327406 | -0.331960    | 5.06  | 0.33 |
| 10 C | 0.554564  | 0.546930  | 0.551794     | 1.40  | 0.55 |
| 11 C | 0.550356  | 0.556053  | 0.557940     | 1.02  | 0.56 |
| 12 C | -0.070337 | -0.075786 | -0.071103    | 7.19  | 0.07 |
| 13 C | -0.111679 | -0.118609 | -0.112591    | 5.84  | 0.11 |
| 14 C | -0.204949 | -0.229498 | -0.225559    | 10.70 | 0.23 |
| 15 C | -0.227322 | -0.244690 | -0.237578    | 7.10  | 0.24 |
| 16 N | 0.044752  | 0.029868  | 0.023484     | 49.83 | 0.02 |
| 17 N | 0.043425  | 0.030250  | 0.023305     | 43.55 | 0.02 |
| 18 C | 0.054526  | 0.064431  | 0.063817     | 15.37 | 0.06 |
| 19 C | 0.088251  | 0.100942  | 0.090435     | 12.57 | 0.09 |
| 20 C | -0.302646 | -0.293671 | -0.305498    | 3.06  | 0.31 |
| 21 C | -0.293878 | -0.301018 | -0.311110    | 2.37  | 0.31 |
| 22 C | -0.165194 | -0.152411 | -0.168246    | 8.39  | 0.17 |
| 23 C | -0.264649 | -0.219637 | -0.217689    | 20.49 | 0.22 |
| 24 H | 0.249390  | 0.253770  | 0.254259     | 1.73  | 0.25 |
| 25 H | 0.206015  | 0.211728  | 0.225514     | 2.70  | 0.23 |
| 26 H | 0.291790  | 0.274331  | 0.272989     | 6.36  | 0.27 |
| 27 H | 0.282051  | 0.266721  | 0.267841     | 5.75  | 0.27 |
| 28 H | 0.315422  | 0.307170  | 0.308282     | 2.69  | 0.31 |
| 29 H | 0.340666  | 0.322992  | 0.318881     | 5.47  | 0.32 |
| 30 H | 0.238365  | 0.242918  | 0.250829     | 1.87  | 0.25 |
| 31 H | 0.227734  | 0.224224  | 0.238147     | 1.57  | 0.24 |
| 32 H | 0.240017  | 0.245875  | 0.254187     | 2.38  | 0.25 |
| 33 H | 0.262161  | 0.269424  | 0.273638     | 2.70  | 0.27 |
| 34 N | -0.285198 | -0.285957 | -0.284898    | 0.27  | 0.28 |
| 35 H | 0.237555  | 0.241299  | 0.250983     | 1.55  | 0.25 |
| 36 C | -0.210808 | -0.209953 | -0.207775    | 0.41  | 0.21 |
| 37 C | -0.222226 | -0.224263 | -0.214512    | 0.91  | 0.21 |
| 38 C | -0.212982 | -0.241836 | -0.234740    | 11.93 | 0.23 |
| 39 N | -0.287851 | -0.287406 | -0.289028    | 0.15  | 0.29 |
| 40 C | -0.173340 | -0.171860 | -0.178051    | 0.86  | 0.18 |
| 41 C | -0.161307 | -0.142331 | -0.157202    | 13.33 | 0.16 |
| 42 C | -0.278868 | -0.277346 | -0.277181    | 0.55  | 0.28 |
| 43 C | 0.252905  | 0.250145  | 0.252898     | 1.10  | 0.25 |
| 44 C | 0.261313  | 0.260447  | 0.261223     | 0.33  | 0.26 |
| 45 C | -0.286049 | -0.283921 | -0.285457    | 0.75  | 0.29 |
| 46 C | -0.121917 | -0.120164 | -0.140107    | 1.46  | 0.14 |

|        |   |           |           |           |      |      |
|--------|---|-----------|-----------|-----------|------|------|
| 47     | H | 0.253658  | 0.252585  | 0.258679  | 0.42 | 0.26 |
| 48     | H | 0.250212  | 0.252998  | 0.257112  | 1.10 | 0.26 |
| 49     | H | 0.247461  | 0.250612  | 0.257120  | 1.26 | 0.26 |
| 50     | H | 0.259599  | 0.263077  | 0.263346  | 1.32 | 0.26 |
| 51     | H | 0.249227  | 0.252597  | 0.256820  | 1.33 | 0.26 |
| 52     | H | 0.273260  | 0.286043  | 0.281155  | 4.47 | 0.28 |
| 53     | H | 0.261694  | 0.277883  | 0.277650  | 5.83 | 0.28 |
| 54     | H | 0.329613  | 0.333742  | 0.318643  | 1.24 | 0.32 |
| 55     | N | -0.310384 | -0.310842 | -0.311133 | 0.15 | 0.31 |
| 56     | N | -0.312704 | -0.313014 | -0.314262 | 0.10 | 0.31 |
| 57     | C | -0.195325 | -0.199442 | -0.196164 | 2.06 | 0.20 |
| 58     | C | -0.187298 | -0.186265 | -0.183341 | 0.55 | 0.18 |
| 59     | C | -0.176412 | -0.174460 | -0.180748 | 1.12 | 0.18 |
| 60     | C | -0.188516 | -0.196955 | -0.196954 | 4.28 | 0.20 |
| 61     | C | -0.197203 | -0.204816 | -0.201067 | 3.72 | 0.20 |
| 62     | C | -0.196654 | -0.194718 | -0.193829 | 0.99 | 0.19 |
| 63     | C | -0.316516 | -0.315126 | -0.303687 | 0.44 | 0.30 |
| 64     | C | -0.287225 | -0.285790 | -0.285014 | 0.50 | 0.29 |
| 65     | C | 0.260254  | 0.257535  | 0.259911  | 1.06 | 0.26 |
| 66     | C | 0.263590  | 0.262954  | 0.262521  | 0.24 | 0.26 |
| 67     | H | 0.253931  | 0.255974  | 0.258496  | 0.80 | 0.26 |
| 68     | H | 0.258958  | 0.262187  | 0.266716  | 1.23 | 0.27 |
| 69     | H | 0.270119  | 0.273736  | 0.273599  | 1.32 | 0.27 |
| 70     | H | 0.244255  | 0.248536  | 0.253166  | 1.72 | 0.25 |
| 71     | H | 0.283452  | 0.298245  | 0.290880  | 4.96 | 0.29 |
| 72     | H | 0.299643  | 0.301258  | 0.291266  | 0.54 | 0.29 |
| 73     | H | 0.271234  | 0.264028  | 0.268039  | 2.73 | 0.27 |
| Mean : |   |           |           |           | 4.48 | 0.25 |

**Table.** Mulliken atomic point charges (in a.u.) of the complex intercalated in site #4 of the DNA fragment at different levels of theory: QM/AMBER, QM/CHARMM and QM/AMBER:ERS. The %FF and %ERS columns correspond to the percentage of variation with respect to the QM/AMBER reference for the QM/CHARMM and QM/AMBER:ERS calculations respectively.

$$\%FF = 100 * \left| \frac{(q_{QM/CHARMM} - q_{QM/AMBER})}{q_{QM/AMBER}} \right|$$

$$\%ERS = 100 * \left| \frac{(q_{QM/AMBER:ERS} - q_{QM/AMBER})}{q_{QM/AMBER}} \right|$$
